# Supplementary material
Source: Research Square preprint supplement (doi:10.21203/rs.3.rs-9105509/v1)
Supplement: Supplementary file 1 [file 511dd1d6f83b1884b35738d0.docx]

**Highlights**

1. The integral rocking and self-centering structure (IRSS) mainly produced rigid body rotation.
2. The proposed theoretical and experimental results were in good agreement.
3. The IRSS exhibited superior low-damage characteristics and seismic resilience.
4. The IRSS exhibited excellent adaptability to the height-to-width and length-to-width ratios of the structure.
